## Article information

### Article title

Development of a questionnaire library for rapid health data acquisition during wildfire events

### Authors

Lilian Liu<sup>1\*</sup>, Christine Loftus<sup>1</sup>, Diana Rohlman<sup>2</sup>, Edmund Seto<sup>1</sup>, Elena Austin<sup>1</sup>

### Affiliations

1. Department of Environmental and Occupational Health Sciences, University of Washington, Seattle, WA 98105, United States.

2. Department of Environmental and Molecular Toxicology, Oregon State University, Corvallis, OR 97331, United States.

### Corresponding author's email address

Lilian Liu\*: [ziqi@uw.edu](mailto:ziqi@uw.edu)

### Keywords

Wildfire; smoke; perishable data; health assessment; data library; questionnaire; survey; instrumentation; disaster response research; data collection

### Abstract

Rapid health outcome data acquisition using existing questionnaires can greatly facilitate time-sensitive research during or after a wildfire event. We aimed to develop a readily available library of questionnaires for self-reported health outcomes to serve as a centralized platform for wildfire researchers seeking to quickly design instruments tailored to their research aims. In this paper, we describe the methodology used to identify relevant health questionnaires and compile them into a structured library. We first followed the Preferred Reporting Items for Systematic reviews and Meta-Analyses (PRISMA) 2020 checklist and performed a systematic literature review of prior research on wildfire exposure and health and used this to 1) identify health outcome categories associated with wildfire and smoke exposure and 2) extract questionnaires used for self-report of health outcomes related to wildfire exposure. We also performed a secondary search of existing questionnaire repositories to identify additional instruments relevant to health impacts of wildfire exposure. All questionnaires (n=100) were organized by eight health outcome categories (mental health = 60, respiratory health = 19, overall health = 17, sleep = 10, cardiovascular health = 4, allergy = 1, irritation (eye, throat, skin) = 2, and metabolic health = 1). The library will be accompanied by a decision-tree framework in development, which will assist future users in building new questionnaires that best fit their study population and research aims. Both the questionnaire library and the forthcoming decision-support framework will be publicly accessible to researchers, public health agencies, and other groups interested in rapid response data collection to characterize the impacts of wildfires. Additionally, this method of creating a wildfire exposure health questionnaire library may serve as a template for rapid collection of questionnaire-based data following other disasters.

## Background

### 1.1 Wildfire events, and the need for rapid collection of perishable questionnaire-based data

Wildfire (WF) events have increased in frequency, intensity, and duration in recent years in the United States (Dennison et al., 2014; Salguero et al., 2020). Exposure to both fires and WF-related smoke contributes to various health outcomes (Finlay et al., 2012; Rizzo & Rizzo, 2024) and leads to numerous public health concerns (Reisen et al., 2015). To characterize WF-related health impacts in defined population, researchers usually acquire health data using various methods, including use of administrative records (e.g., hospitalization records, insurance claims, or pharmaceutical records), surveillance/census data, biospecimen collection and analyses, clinical exams and assessments, crowdsourced data (e.g. secondary data from commercial companies (e.g. Lumos Lab) or research frameworks (e.g. Apple ResearchKit)), and administration of questionnaires for self-reported impacts (Barkoski et al., 2024). Due to the rapidly evolving nature of disasters, such as of WF events, health data are often perishable (Adams et al., 2024) and need to be collected in a timely fashion post-disaster. Questionnaires are useful tools for ascertainment of self-reported health impacts, but *de novo* questionnaire design can be slow, impeding rapid deployment of surveys and increasing the chances of limited accuracy due to recall. Moreover, in times of disasters, there is a need to identify the minimum relevant set of questions needed for research to not overburden WF affected study populations. Additionally, data collected by different research groups may not always be comparable to each other as the data collection processes vary. This would likely lead to less scientific discovery and interpretation of results due to inconsistent data collection.

To address the need for WF-related questionnaires and to encourage reproducible data collection research design, we are developing a decision-support framework to help WF researchers identify a library of relevant questionnaires specific to the WF context and the research goals. This decision-support framework aims to facilitate rapid and reproducible questionnaire design for perishable WF-related human exposure and health outcome data acquisition. Here we present an intermediate product of the framework – a centralized platform consisting of WF-relevant health questionnaires gathered from a literature review and search of existing libraries of health questionnaires – that can be used either with the decision-support framework or as a standalone resource to support time-sensitive WF research.

### 1.2 Objectives and aims

Rapid data acquisition is essential to support effective disaster research, such as research related to the health impacts of WF events (Gorbea Díaz et al., 2023; Morton & Levy, 2011). Therefore, having a centralized health questionnaire library built within a decision-support framework can help support time-sensitive WF research. This methods article describes the process of acquiring and creating a library of health questionnaires, which is a core component of our forthcoming decision-support framework for WF research. Our methods, described herein, are intended to serve as methodological documentation to support the released of the framework and its health questionnaire library as a public resource.

## Method details

### 2.1 Literature review and health outcome determination

In this study, we define WF exposure as impacts of WFs in a nonoccupational context, including fires due to non-prescribed burns or wildland-urban interface (WUI) fire, as well as exposure to WF smoke from either a local WF event or migrated smoke from a WF event afar. We will “WF” hereafter to represent both WF and WF smoke. In addition to the generic health impacts, because increased asthma symptoms are an

important health outcome associated with WF exposure (Balmes et al., 2024; Noah et al., 2023), we decided to solicit studies that reported respiratory health impact from WF exposure including asthma. To identify relevant published literature, we used a combination of search terms. The search term combination must include at least one word from the three topics, including 1) “wildfire” or “wildfire smoke”, 2a) “exposure” or 2b) “health”, “impact(s)/effect(s)”, or “asthma/respiratory”, and 3) “assessment”. We applied the search term combinations (n = 14) on Web of Science and PubMed and exported results as .txt files to the online systematic review tool Covidence. To screen for eligible articles, we applied inclusion criteria, including that the aim of the paper was on non-occupational WF exposure/health outcomes assessment, the paper described questionnaires for collecting reported WF-related human exposure and/or health outcome data, and the paper was published in English. Exclusion criteria include no questionnaire-based assessments of human WF exposure or health outcomes conducted, only non-English questionnaires provided, focus on WF exposure in occupational context only, perceived risks without presence of WF (e.g. likelihood of a neighborhood of future WF event), property damage, land management, air treatment efficacy, or exposure reduction/ health therapeutic effects (e.g. air treatment technology efficacy). We included questionnaires regardless of administration (e.g., self-administered vs. administered by research team staff). We found 878 studies after removing 3,049 duplicates. After screening based on title and abstract, 106 were assessed for full-text screening and ultimately, 30 studies (Table S1) (Adu MK et al., 2022, 2024; Agyapong B, Shalaby R, Eboreime E, Obuobi-Donkor G, et al., 2022; Agyapong B, Shalaby R, Eboreime E, Wei Y, et al., 2022; Agyapong et al., 2022; Agyapong VIO et al., 2020; Brown et al., 2019; Brown MRG et al., 2021; Bryant RA et al., 2018; Castillo C et al., 2024; Cherry N & Haynes W, 2017; Cowlshaw S et al., 2021; Haikerwal A et al., 2021; Hoshiko S et al., 2023; Künzli et al., 2006; Mao W et al., 2022, 2024; Marshall et al., 2007; Mirabelli et al., 2009; Mirabelli MC et al., 2022; Moosavi S et al., 2019; Obuobi-Donkor G et al., 2024; Pacella BJ et al., 2024; Papadatou et al., 2012; Papanikolaou V et al., 2011; Psarros C et al., 2017; Ritchie A et al., 2021; Rodney RM et al., 2021; Usher K et al., 2022; Wasiaak J et al., 2013) met all inclusion criteria and were selected for data extraction. A Preferred Reporting Items for Systematic reviews and Meta-Analyses (PRISMA) flow diagram (Fig. 1) provides details about the literature review process, which was conducted in Covidence. Additionally, we separately searched for asthma-related questionnaires in the Research Electronic Data Capture (REDCap) Shared Library for the same reason for literature review searches.

During the literature review data extraction step, we extracted all full-text questionnaires used to collect information on reported health impacts during or after WF events and categorized them based on the health outcome(s) assessed. Based on our eligibility criteria, included questionnaires/questionnaire sections (i.e. for questionnaires with multiple sections addressing different health outcomes, we considered that section as its own questionnaire to facilitate organization by health outcome category) assess health outcomes that are from direct impact of WF exposure. We will use “questionnaire(s)” hereafter to represent questionnaires/questionnaire sections. For example, a questionnaire may ask questions like “during or immediately after the fire, did you experience any health problems caused or made worse by the fires?” (Cherry N & Haynes W, 2017). Additionally, we separately searched for asthma-related questionnaires in the Research Electronic Data Capture (REDCap) Shared Library for the same reason for literature review searches. Overall, we identified nine health outcome categories: mental health, respiratory health, sleep, cardiovascular health, allergies, irritation (eye, throat, skin), metabolic health (e.g. type II diabetes), and overall health. A total of 42 questionnaires that cover these health outcome categories were found in the research articles, and 14 asthma questionnaires were found in the REDCap Shared Library.

Wildfire exposure and health assessment

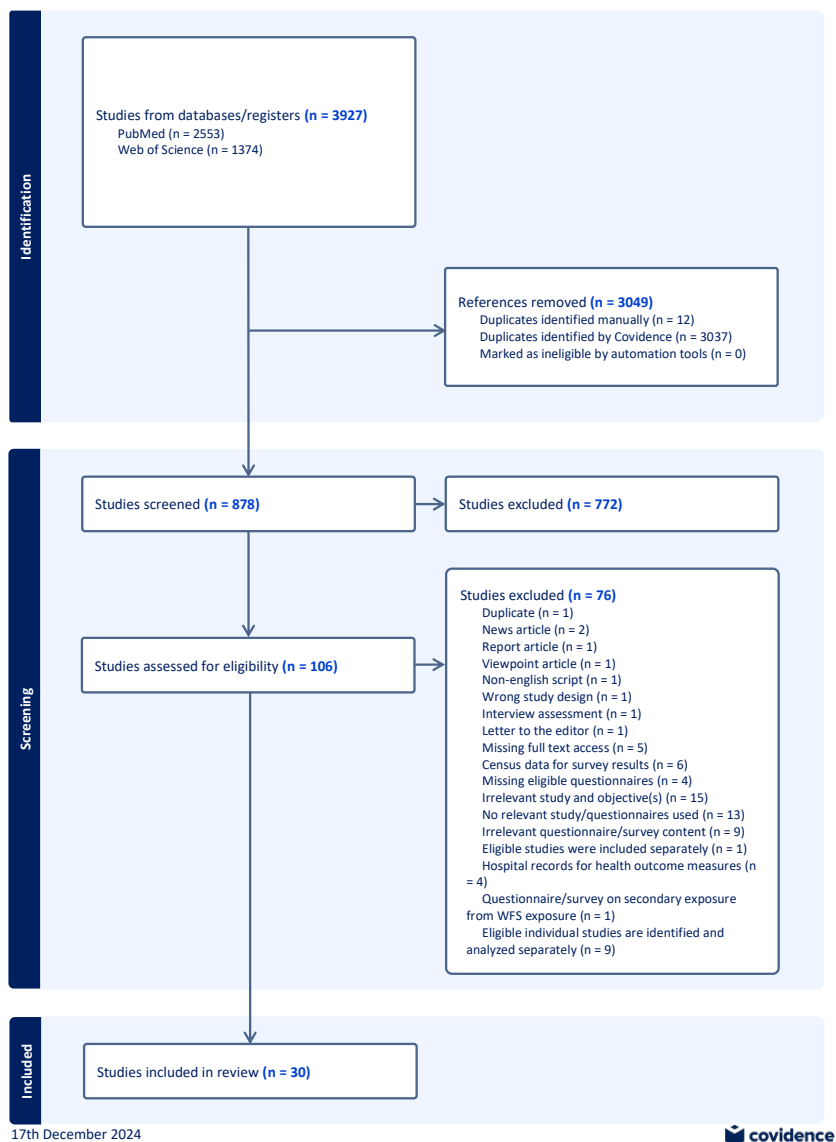

Figure 1. PRISMA flow diagram of literature review results.

## 2.2. Extended search for health questionnaires

Because our literature review approach could miss many questionnaires that are commonly used in public health research outside the literature specific to WF impacts, we additionally searched for relevant health questionnaires on REDCap Shared Library as REDCap performs questionnaire acquisition twice annually from other online repositories (e.g. PROMIS). Upon review, the decision was made to directly search for other existing questionnaires related to the health outcomes of interest. These questionnaires were considered to be of high value to WF researchers. Therefore, we used the health outcome categories

identified in 2.1 as keywords (Table 2) and searched existing health questionnaires on REDCap Shared Library. We screened all search results and included only questionnaires that are useful for WF research. For example, we would include a questionnaire if it asked “in the past 7 days, my sleep was restful.” with Likert ranking options because the question specifically relates to the topic of sleep. Questionnaires that did not contain questions relevant to the health outcomes (Table 1), or that relied solely on clinical measurements and diagnoses (e.g. “severity of asthma exacerbation expressed in forced expiratory volume in one second (FEV1) %”) were excluded.

We found an additional 58 questionnaires assessing specific health conditions from the health outcome categories and finalized the library with a total of 100 questionnaires (Table 1). Importantly, this secondary search identified questionnaires that evaluate health effects in adolescent and younger children, enabling assessment of WF exposure and health effects across the lifespan.

Table 1. Summary of questionnaire/questionnaire sections on different health outcome assessments.

| Health outcome category<br>(# of questionnaires) | Specific health condition<br>(#of questionnaires) |
|--------------------------------------------------|---------------------------------------------------|
| Mental health (60)                               | Alcohol consumption (4)                           |
|                                                  | Anger/irritability (6)                            |
|                                                  | Anxiety (9)                                       |
|                                                  | Anxiety and depression (3)                        |
|                                                  | Depression (12)                                   |
|                                                  | Drug use (1)                                      |
|                                                  | E-cigarettes use (1)                              |
|                                                  | Health many (1)                                   |
|                                                  | Life satisfaction (1)                             |
|                                                  | Marijuana use (1)                                 |
|                                                  | Mental health (general) (5)                       |
|                                                  | Positive effect (3)                               |
|                                                  | Psychological distress (1)                        |
|                                                  | PTSD (5)                                          |
|                                                  | Quality of life (1)                               |
|                                                  | Resilience (2)                                    |
| Self-esteem (1)                                  |                                                   |
| Strength and difficulties (1)                    |                                                   |
| Substance use (1)                                |                                                   |
| Tobacco use (1)                                  |                                                   |
| Traumatic experience (1)                         |                                                   |
| Respiratory health (19)                          | Asthma (13)                                       |
|                                                  | Dyspnea (1)                                       |
|                                                  | Health many (5)                                   |
| Overall health (17)                              | Burn (1)                                          |
|                                                  | General health (4)                                |
|                                                  | Health many (2)                                   |
|                                                  | Mobility (1)                                      |
|                                                  | Pain (8)                                          |
| Physical activity (1)                            |                                                   |
| Sleep (10)                                       | Insomnia (1)                                      |
|                                                  | Sleep difficulty (1)                              |
|                                                  | Sleep disorder (1)                                |
|                                                  | Sleep disturbance (3)                             |
|                                                  | Sleep health (2)                                  |
| Sleep-related impairment (2)                     |                                                   |

| Health outcome category<br>(# of questionnaires) | Specific health condition<br>(#of questionnaires) |
|--------------------------------------------------|---------------------------------------------------|
| Cardiovascular Health (4)                        | Health many (2)<br>Hypertension (2)               |
| Allergy (1)                                      | Health many (1)                                   |
| Irritation (eye, throat, skin) (2)               | Health many (2)                                   |
| Metabolic health (1)                             | Health many (1)                                   |

### 2.3 Health questionnaire library

We organized all questionnaire content into an Excel spreadsheet with the first worksheet providing general information and user instructions and the following worksheets listing questionnaires by health outcome categories. For each questionnaire, we provided: specific health condition assessed, titles (full and abbreviated), questionnaire note, source, website link (if applicable), assessment reference period (e.g., last 7 days, etc.), target age group, and literature citing use of the questionnaire based on our literature review (Table 2). These column headers were created to help users navigate and filter the options. These worksheets will be updated periodically by acquiring and integrating new questionnaires to ensure the library remains current.

The library is intended to be made available as an interactive online resource that is openly accessible. The library can be used as a standalone tool, or in combination with the decision-support framework. By going directly to the library, users can view and filter the questionnaires based on their unique research needs, and acquire them by visiting the link provided, viewing the cited papers, or by searching for the questionnaire title in a web search engine. The added benefit of having the library is to facilitate WF research design, as the content in the library may help researchers brainstorm health outcomes that would potentially apply to their study objectives and enabling further scientific discovery by serving as a standard tool that allow consistent data collection design for later data sharing and data reuse. Additionally, the reuse of existing questionnaires from other WF studies may promote consistency between studies, allowing for comparisons of findings between WF events, which would enhance overall reliability and reproducibility of WF research.

Table 2. Health questionnaire library column headers and descriptions.

| <b>Column headers</b>                    | <b>Column descriptions</b>                                                                                                                                                                                                                                                                                                                                                                                                                                                                                                                                                                                                                                                                                                                    |
|------------------------------------------|-----------------------------------------------------------------------------------------------------------------------------------------------------------------------------------------------------------------------------------------------------------------------------------------------------------------------------------------------------------------------------------------------------------------------------------------------------------------------------------------------------------------------------------------------------------------------------------------------------------------------------------------------------------------------------------------------------------------------------------------------|
| <b>Specific Condition</b>                | This lists specific health conditions under each general health outcome category. "Health many" refers to multiple conditions that are included under the general health outcome                                                                                                                                                                                                                                                                                                                                                                                                                                                                                                                                                              |
| <b>Questionnaire title</b>               | Full questionnaire title.                                                                                                                                                                                                                                                                                                                                                                                                                                                                                                                                                                                                                                                                                                                     |
| <b>Questionnaire title (abbreviated)</b> | Abbreviated questionnaire title. Some studies that deployed questionnaires only reported abbreviated questionnaire titles.                                                                                                                                                                                                                                                                                                                                                                                                                                                                                                                                                                                                                    |
| <b>Questionnaire note</b>                | This note section contains information such as the detailed questionnaire/survey section for the specific condition assessment.                                                                                                                                                                                                                                                                                                                                                                                                                                                                                                                                                                                                               |
| <b>Source</b>                            | This provides the source where the questionnaire can be found. Note, users can also find questionnaires from other sources that are not listed here but should be checking to make sure questionnaires from other sources are valid and authenticated.                                                                                                                                                                                                                                                                                                                                                                                                                                                                                        |
| <b>Link</b>                              | <p>This column shares the link to the questionnaire. For instruments uploaded in REDCap, links are unavailable but the questionnaires can be found from searching on the REDCap Shared Library (<a href="https://redcap.vumc.org/consortium/library/search.php">https://redcap.vumc.org/consortium/library/search.php</a>). Note, to download REDCap instrument, users will need to log in through their research institute account.</p> <p>Also note, to get a full list of instruments that are available on REDCap Shared Library, users can follow the hyperlink on RECap page (<a href="https://projectredcap.org/resources/library/">https://projectredcap.org/resources/library/</a>) "download a list of all library instruments"</p> |
| <b>Assessment time scale</b>             | This column provides the time scale each questionnaire is designed to assess. For example, PHQ-9 for depression evaluation assesses the symptoms over the past 2 weeks.                                                                                                                                                                                                                                                                                                                                                                                                                                                                                                                                                                       |
| <b>Target age group</b>                  | This column shares age group of the target population the questionnaire is designed to assess.                                                                                                                                                                                                                                                                                                                                                                                                                                                                                                                                                                                                                                                |
| <b>Literature where used</b>             | This column shares the published studies that have deployed the questionnaire(s).                                                                                                                                                                                                                                                                                                                                                                                                                                                                                                                                                                                                                                                             |



## Method validation

### 3.1 Health outcomes

As part of a decision-support framework, this library of questionnaires provides WF researchers with a centralized platform to browse and acquire relevant instruments for their studies and is available as a spreadsheet (Supplemental Materials). The creation of this library is in direct response to researcher needs; a survey of researchers within the National Institute of Environmental Sciences (NIEHS) Disaster Response Research (DR2) network revealed a need for tools to enable rapid data acquisition, and a library of health questionnaires. Our library addresses both needs; users of the library can browse and acquire a variety of health questionnaires to expedite their research by deploying readily available instruments.

The library has been made available to the Public Health Extreme Events Research (PHEER) group, which is a “*public health researcher-led network that can mobilize rapidly, inform evolving disaster research agendas and funding decisions, and advance the field of public health disaster science*”. Currently, PHEER is responding to the January 2025 wildfire events in Los Angeles, California, USA. Our library is supporting time-sensitive mobilization efforts by providing existing questionnaire instruments to facilitate perishable WF health outcome data acquisition.

## Limitations

We conducted a robust literature review, supplemented by a search of health specific questionnaire repositories to identify questionnaires that could be used to assess impacts of WF exposure in humans. However, we acknowledge several limitations with our approach:

1) Validity of questionnaires: Not all included questionnaires have undergone formal validation. However, these questionnaires have been deployed in wildfire research settings and used to collect perishable data. During our periodic health questionnaire library maintenance, we will search for and add validation status to questionnaires and continue to expand the library over time. Researchers are advised to verify the suitability of each questionnaire before deployment.

2) Limited scope of search in identifying questionnaires: The questionnaire library was compiled with health questionnaires identified from a structure literature review and extended research using what was found as most relevant health outcome categories from the literature review result. Factors such as database restriction, language limitations, exclusion of unpublished instruments, limited searches in single online questionnaire repository (i.e. REDCap Shared Library) may have contributed to gaps in coverage of the literature review results and health questionnaire acquisition. Future maintenance of the library should expand search strategies to include additional sources such as systematic reviews, government agencies, and international datasets, as well as expand the health questionnaire acquisition using various online repositories other than REDCap Shared Library.

3) Limited guidance on questionnaire adaptations: While the library includes a range of questionnaires covering multiple health outcomes, there is no explicit guidance on how researchers can adapt these instruments to different populations (e.g., pediatric groups, non-English speakers). Researchers should consider the cultural and contextual appropriateness of each instrument before application. Future updates should incorporate recommendations on questionnaire modifications while maintaining psychometric integrity.

4) Lack of structured evaluation: The usability and effectiveness of the library has not yet been formally assessed. While the library has been curated based on expert discussion and review, no structured evaluation has been conducted to assess alignment with WF researchers' needs in real time. Future work should include pilot and feasibility testing with WF researchers to refine the library based on practical usability feedback.

Given the ongoing large scale WF events, such as the 2025 Los Angeles wildfires, repositories such as ours are essential for supporting rapid human health data acquisition. Future updates will prioritize validation studies to ensure data reliability, while the literature review will be broadened to include additional relevant questionnaires. Adaptation guidelines will be developed for diverse populations, and pilot testing with

wildfire researchers will enhance usability. These efforts will ensure this library remains a reliable, adaptable, and valuable tool in wildfire disaster research.

### **Ethics statements**

Not applicable.

### **CRedit author statement**

**Lilian Liu:** Conceptualization, Methodology, Formal analysis, Investigation, Data curation, Writing - Original draft. **Christine Loftus:** Conceptualization, Validation, Writing - Review & Editing. **Diana Rohlman:** Conceptualization, Validation, Writing - Review & Editing. **Edmund Seto:** Conceptualization, Validation, Writing - Review & Editing, Supervision. **Elena Austin:** Conceptualization, Methodology, Validation, Writing - Review & Editing, Supervision, Investigation Funding acquisition.

### **Acknowledgments**

Supports for this research were provided by grants from the National Institute of Environmental Health Sciences, National Institutes of Health (UW EDGE Center, P30ES007033; P30ES030287; P42ES016465). The content is solely the responsibility of the authors and does not necessarily represent the official views of the National Institutes of Health.

### **Declaration of interests**

The authors declare that they have no known competing financial interests or personal relationships that could have appeared to influence the work reported in this paper.

The authors declare the following financial interests/personal relationships which may be considered as potential competing interests:

## References

- Adams, R. M., Evans, C. M., & Peek, L. (2024). Defining, collecting, and sharing perishable disaster data. *Disasters*, *48*(1), e12592. <https://doi.org/10.1111/disa.12592>
- Adu MK, Eboreime E, Shalaby R, Sapara A, Agyapong B, Obuobi-Donkor G, Mao W, Owusu E, Oluwasina F, Pazderka H, & Agyapong VIO. (2022). Five Years after the Fort McMurray Wildfire: Prevalence and Correlates of Low Resilience. *Behav Sci (Basel)*, *12*(4). <https://doi.org/10.3390/bs12040096>
- Adu MK, Shalaby R, Agyapong B, Dias RDL, & Agyapong VIO. (2024). Exploring the prevalence and predictors of low resilience and likely PTSD in residents of two provinces in Canada during the 2023 wildfires. *Front Public Health*, *12*, 1343399. <https://doi.org/10.3389/fpubh.2024.1343399>
- Agyapong, B., Eboreime, E., Shalaby, R., Pazderka, H., Obuobi-Donkor, G., Adu, M., Mao, W., Oluwasina, F., Owusu, E., Greenshaw, A., & Agyapong, V. (2022). Mental Health Impacts of Wildfire, Flooding and COVID-19 on Fort McMurray School Board Staff and Other Employees: A Comparative Study. *INTERNATIONAL JOURNAL OF ENVIRONMENTAL RESEARCH AND PUBLIC HEALTH*, *19*(1). <https://doi.org/10.3390/ijerph19010435>
- Agyapong B, Shalaby R, Eboreime E, Obuobi-Donkor G, Owusu E, Adu MK, Mao W, Oluwasina F, & Agyapong VIO. (2022). Cumulative trauma from multiple natural disasters increases mental health burden on residents of Fort McMurray. *Eur J Psychotraumatol*, *13*(1), 2059999. <https://doi.org/10.1080/20008198.2022.2059999>
- Agyapong B, Shalaby R, Eboreime E, Wei Y, & Agyapong VIO. (2022). Self-Reported Alcohol Abuse and the Desire to Receive Mental Health Counselling Predict Suicidal Thoughts/Thoughts of Self-Harm among Female Residents of Fort McMurray. *Int J Environ Res Public Health*, *19*(20). <https://doi.org/10.3390/ijerph192013620>
- Agyapong VIO, Ritchie A, Brown MRG, Noble S, Mankowski M, Denga E, Nwaka B, Akinjise I, Corbett SE, Moosavi S, Chue P, Li XM, Silverstone PH, & Greenshaw AJ. (2020). Long-Term Mental Health Effects of a Devastating Wildfire Are Amplified by Socio-Demographic and Clinical

Antecedents in Elementary and High School Staff. *Front Psychiatry*, 11, 448.

<https://doi.org/10.3389/fpsy.2020.00448>

Balmes, J. R., Hicks, A., Johnson, M. M., & Nadeau, K. C. (2024). The Effect of Wildfires on Asthma and Allergies. *The Journal of Allergy and Clinical Immunology: In Practice*.

<https://doi.org/10.1016/j.jaip.2024.12.004>

Barkoski, J., Van Fleet, E., Liu, A., Ramsey, S., Kwok, R. K., & Miller, A. K. (2024). Data Linkages for Wildfire Exposures and Human Health Studies: A Scoping Review. *GeoHealth*, 8(3),

e2023GH000991. <https://doi.org/10.1029/2023GH000991>

Brown, M. R. G., Agyapong, V., Greenshaw, A. J., Cribben, I., Brett-MacLean, P., Drolet, J., McDonald-Harker, C., Omeje, J., Mankowski, M., Noble, S., Kitching, D., & Silverstone, P. H. (2019). After the Fort McMurray wildfire there are significant increases in mental health symptoms in grade 7–12 students compared to controls. *BMC Psychiatry*, 19(1), 18. <https://doi.org/10.1186/s12888-018-2007-1>

Brown MRG, Pazderka H, Agyapong VIO, Greenshaw AJ, Cribben I, Brett-MacLean P, Drolet J, McDonald-Harker CB, Omeje J, Lee B, Mankowski M, Noble S, Kitching DT, & Silverstone PH. (2021). Mental Health Symptoms Unexpectedly Increased in Students Aged 11-19 Years During the 3.5 Years After the 2016 Fort McMurray Wildfire: Findings From 9,376 Survey Responses. *Front Psychiatry*, 12, 676256. <https://doi.org/10.3389/fpsy.2021.676256>

Bryant RA, Gibbs L, Gallagher HC, Pattison P, Lusher D, MacDougall C, Harms L, Block K, Sinnott V, Ireton G, Richardson J, & Forbes D. (2018). Longitudinal study of changing psychological outcomes following the Victorian Black Saturday bushfires. *Aust N Z J Psychiatry*, 52(6), 542–551. <https://doi.org/10.1177/0004867417714337>

Castillo C, Dittrich R, Shandas V, Gall E, & Starry O. (2024). Mitigating wildfire smoke inside homes: Evidence from Oregon, September 2020. *Risk Anal*, 44(5), 1114–1127.

<https://doi.org/10.1111/risa.14252>

- Cherry N & Haynes W. (2017). Effects of the Fort McMurray wildfires on the health of evacuated workers: Follow-up of 2 cohorts. *CMAJ Open*, 5(3), E638–E645.  
<https://doi.org/10.9778/cmajo.20170047>
- Cowlshaw S, Metcalf O, Varker T, Stone C, Molyneaux R, Gibbs L, Block K, Harms L, MacDougall C, Gallagher HC, Bryant R, Lawrence-Wood E, Kellett C, O’Donnell M, & Forbes D. (2021). Anger Dimensions and Mental Health Following a Disaster: Distribution and Implications After a Major Bushfire. *J Trauma Stress*, 34(1), 46–55. <https://doi.org/10.1002/jts.22616>
- Dennison, P. E., Brewer, S. C., Arnold, J. D., & Moritz, M. A. (2014). Large wildfire trends in the western United States, 1984–2011. *Geophysical Research Letters*, 41(8), 2928–2933.  
<https://doi.org/10.1002/2014GL059576>
- Finlay, S. E., Moffat, A., Gazzard, R., Baker, D., & Murray, V. (2012). Health Impacts of Wildfires. *PLoS Currents*, 4, e4f959951cce2c. <https://doi.org/10.1371/4f959951cce2c>
- Gorbea Díaz, L., Chopel, A., Fernós Sagebién, A., Bonilla Marrero, L., Rivera Figueroa, G., Pecci Zegrí, N., Cardona, A., Mulero Oliveras, J., La Santa, L., & Sánchez Rey, P. (2023). Collecting and communicating perishable data in a post-disaster context: Rapid research and rapid dissemination. *Frontiers in Sociology*, 8. <https://doi.org/10.3389/fsoc.2023.959765>
- Haikerwal A, Doyle LW, Wark JD, Irving L, & Cheong JL. (2021). Wildfire smoke exposure and respiratory health outcomes in young adults born extremely preterm or extremely low birthweight. *Environ Res*, 197, 111159. <https://doi.org/10.1016/j.envres.2021.111159>
- Hoshiko S, Buckman JR, Jones CG, Yeomans KR, Mello A, Thilakarathne R, Sergienko E, Allen K, Bello L, & Rappold AG. (2023). Responses to Wildfire and Prescribed Fire Smoke: A Survey of a Medically Vulnerable Adult Population in the Wildland-Urban Interface, Mariposa County, California. *Int J Environ Res Public Health*, 20(2). <https://doi.org/10.3390/ijerph20021210>
- Künzli, N., Avol, E., Wu, J., Gauderman, W. J., Rappaport, E., Millstein, J., Bennion, J., McConnell, R., Gilliland, F. D., Berhane, K., Lurmann, F., Winer, A., & Peters, J. M. (2006). Health Effects of

- the 2003 Southern California Wildfires on Children. *American Journal of Respiratory and Critical Care Medicine*, 174(11), 1221–1228. <https://doi.org/10.1164/rccm.200604-519OC>
- Mao W, Adu M, Eboeime E, Shalaby R, Nkire N, Agyapong B, Pazderka H, Obuobi-Donkor G, Owusu E, Oluwasina F, Zhang Y, & Agyapong VIO. (2022). Post-Traumatic Stress Disorder, Major Depressive Disorder, and Wildfires: A Fifth-Year Postdisaster Evaluation among Residents of Fort McMurray. *Int J Environ Res Public Health*, 19(15). <https://doi.org/10.3390/ijerph19159759>
- Mao W, Shalaby R, Agyapong B, Obuobi-Donkor G, Da Luz Dias R, & Agyapong VIO. (2024). Devastating Wildfires and Mental Health: Major Depressive Disorder Prevalence and Associated Factors among Residents in Alberta and Nova Scotia, Canada. *Behav Sci (Basel)*, 14(3). <https://doi.org/10.3390/bs14030209>
- Marshall, G. N., Schell, T. L., Elliott, M. N., Rayburn, N. R., & Jaycox, L. H. (2007). Psychiatric Disorders Among Adults Seeking Emergency Disaster Assistance After a Wildland-Urban Interface Fire. *Psychiatric Services*, 58(4), 509–514. <https://doi.org/10.1176/ps.2007.58.4.509>
- Mirabelli, M. C., Künzli, N., Avol, E., Gilliland, F. D., Gauderman, W. J., McConnell, R., & Peters, J. M. (2009). Respiratory Symptoms Following Wildfire Smoke Exposure: Airway Size as a Susceptibility Factor. *Epidemiology (Cambridge, Mass.)*, 20(3), 451. <https://doi.org/10.1097/EDE.0b013e31819d128d>
- Mirabelli MC, Vaidyanathan A, Pennington AF, Ye D, & Trenga CA. (2022). Wildfire smoke and symptoms affecting mental health among adults in the U.S. state of Oregon. *Prev Med*, 164, 107333. <https://doi.org/10.1016/j.ypmed.2022.107333>
- Moosavi S, Nwaka B, Akinjise I, Corbett SE, Chue P, Greenshaw AJ, Silverstone PH, Li XM, & Agyapong VIO. (2019). Mental Health Effects in Primary Care Patients 18 Months After a Major Wildfire in Fort McMurray: Risk Increased by Social Demographic Issues, Clinical Antecedents, and Degree of Fire Exposure. *Front Psychiatry*, 10, 683. <https://doi.org/10.3389/fpsy.2019.00683>

Morton, M., & Levy, J. L. (2011). Challenges in Disaster Data Collection during Recent Disasters.

*Prehospital and Disaster Medicine*, 26(3), 196–201.

<https://doi.org/10.1017/S1049023X11006339>

Noah, T. L., Worden, C. P., Rebuli, M. E., & Jaspers, I. (2023). The Effects of Wildfire Smoke on

Asthma and Allergy. *Current Allergy and Asthma Reports*, 23(7), 375–387.

<https://doi.org/10.1007/s11882-023-01090-1>

Obuobi-Donkor G, Shalaby R, Agyapong B, da Luz Dias R, & Agyapong VIO. (2024). 2023 Wildfires in Canada: Living in Wildfire Regions in Alberta and Nova Scotia Doubled the Odds for Residents to Experience Likely Generalized Anxiety Disorder Symptoms. *J Clin Med*, 13(11).

<https://doi.org/10.3390/jcm13113234>

Pacella BJ, Cowlshaw S, Gibbs L, Bryant RA, Brady K, Gallagher C, Molyneaux R, Gibson K, Block K, Harms L, Forbes D, & O'Donnell ML. (2024). Trajectory of adjustment difficulties following disaster: 10-year longitudinal cohort study. *BJPsych Open*, 10(2), e57.

<https://doi.org/10.1192/bjo.2024.3>

Papadatou, D., Giannopoulou, I., Bitsakou, P., Bellali, T., Talias, M., & Tselepi, K. (2012). Adolescents' reactions after a wildfire disaster in Greece. *JOURNAL OF TRAUMATIC STRESS*, 25(1), 57–63.

<https://doi.org/10.1002/jts.21656>

Papanikolaou V, Leon GR, Kyriopoulos J, Levett J, & Pallis E. (2011). Surveying the ashes: Experience from the 2007 Peloponnese wildfires six months after the disaster. *Prehosp Disaster Med*, 26(2),

79–89. <https://doi.org/10.1017/S1049023X11000094>

Psarros C, Theleritis C, Economou M, Tzavara C, Kioulos KT, Mantonakis L, Soldatos CR, & Bergiannaki JD. (2017). Insomnia and PTSD one month after wildfires: Evidence for an independent role of the “fear of imminent death”. *Int J Psychiatry Clin Pract*, 21(2), 137–141.

<https://doi.org/10.1080/13651501.2016.1276192>



- Reisen, F., Duran, S. M., Flannigan, M., Elliott, C., & Rideout, K. (2015). Wildfire smoke and public health risk. *International Journal of Wildland Fire*, 24(8), 1029.  
<https://doi.org/10.1071/WF15034>
- Ritchie A, Sautner B, Omege J, Denga E, Nwaka B, Akinjise I, Corbett SE, Moosavi S, Greenshaw A, Chue P, Li XM, & Agyapong VIO. (2021). Long-Term Mental Health Effects of a Devastating Wildfire Are Amplified by Sociodemographic and Clinical Antecedents in College Students. *Disaster Med Public Health Prep*, 15(6), 707–717. <https://doi.org/10.1017/dmp.2020.87>
- Rizzo, L. V., & Rizzo, M. C. F. V. (2024). Wildfire smoke and health impacts: A narrative review. *Jornal de Pediatria*. <https://doi.org/10.1016/j.jpmed.2024.11.006>
- Rodney RM, Swaminathan A, Calcar AL, Christensen BK, Lal A, Lane J, Leviston Z, Reynolds J, Trevenar S, Vardoulakis S, & Walker I. (2021). Physical and Mental Health Effects of Bushfire and Smoke in the Australian Capital Territory 2019-20. *Front Public Health*, 9, 682402.  
<https://doi.org/10.3389/fpubh.2021.682402>
- Salguero, J., Li, J., Farahmand, A., & Reager, J. T. (2020). Wildfire Trend Analysis over the Contiguous United States Using Remote Sensing Observations. *Remote Sensing*, 12(16), Article 16.  
<https://doi.org/10.3390/rs12162565>
- Usher K, Durkin J, Douglas L, Coffey Y, & Bhullar N. (2022). Coping styles and mental health outcomes of community members affected by black summer 2019-20 bushfires in Australia. *Int J Ment Health Nurs*, 31(5), 1176–1185. <https://doi.org/10.1111/inm.13035>
- Wasiak J, Mahar P, Lee S, Paul E, Spinks A, Pfitzer B, Cleland H, & Gabbe B. (2013). 12-month generic health status and psychological distress outcomes following an Australian natural disaster experience: 2009 Black Saturday Wildfires. *Injury*, 44(11), 1443–1447.  
<https://doi.org/10.1016/j.injury.2012.08.060>



## Wildfire exposure and health assessment

medRxiv preprint doi: <https://doi.org/10.1101/2025.02.10.25321891>; this version posted February 13, 2025. The copyright holder for this preprint (which was not certified by peer review) is the author/funder, who has granted medRxiv a license to display the preprint in perpetuity. It is made available under a [CC-BY-NC-ND 4.0 International license](https://creativecommons.org/licenses/by-nc-nd/4.0/).

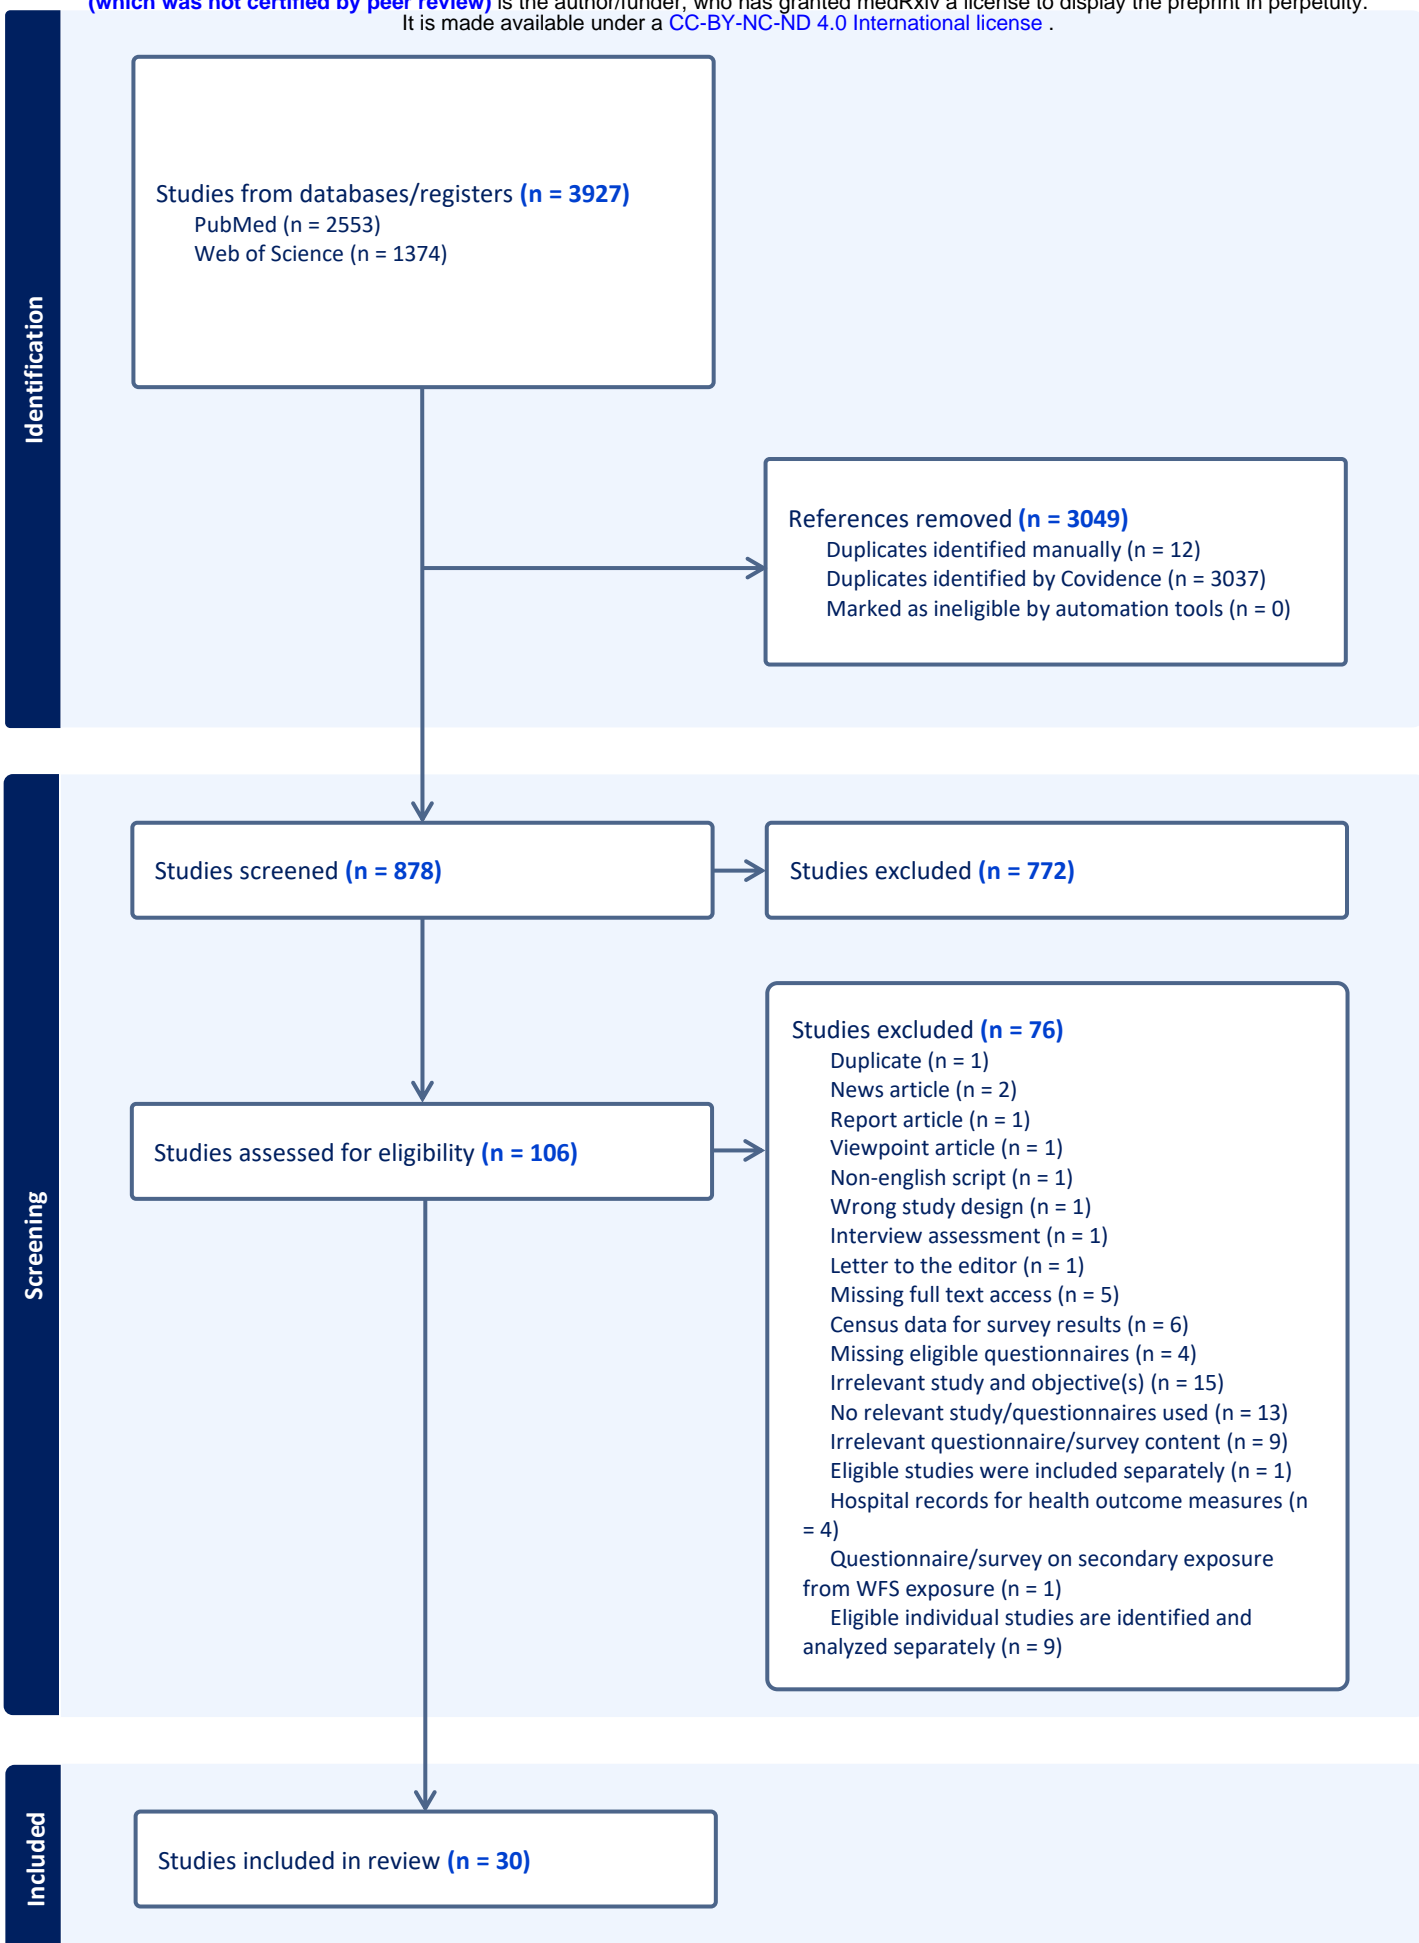

| Health outcome category<br>(# of questionnaires) | Specific health condition<br>(#of questionnaires)                                                                                                                                                                                                                                                                                                                                                                                                                                           |
|--------------------------------------------------|---------------------------------------------------------------------------------------------------------------------------------------------------------------------------------------------------------------------------------------------------------------------------------------------------------------------------------------------------------------------------------------------------------------------------------------------------------------------------------------------|
| Mental health (60)                               | Alcohol consumption (4)<br>Anger/irritability (6)<br>Anxiety (9)<br>Anxiety and depression (3)<br>Depression (12)<br>Drug use (1)<br>E-cigarettes use (1)<br>Health many (1)<br>Life satisfaction (1)<br>Marijuana use (1)<br>Mental health (general) (5)<br>Positive effect (3)<br>Psychological distress (1)<br>PTSD (5)<br>Quality of life (1)<br>Resilience (2)<br>Self-esteem (1)<br>Strength and difficulties (1)<br>Substance use (1)<br>Tobacco use (1)<br>Traumatic experience (1) |
| Respiratory health (19)                          | Asthma (13)<br>Dyspnea (1)<br>Health many (5)                                                                                                                                                                                                                                                                                                                                                                                                                                               |
| Overall health (17)                              | Burn (1)<br>General health (4)<br>Health many (2)<br>Mobility (1)<br>Pain (8)<br>Physical activity (1)                                                                                                                                                                                                                                                                                                                                                                                      |
| Sleep (10)                                       | Insomnia (1)<br>Sleep difficulty (1)<br>Sleep disorder (1)<br>Sleep disturbance (3)<br>Sleep health (2)<br>Sleep-related impairment (2)                                                                                                                                                                                                                                                                                                                                                     |
| Cardiovascular Health (4)                        | Health many (2)                                                                                                                                                                                                                                                                                                                                                                                                                                                                             |

---

|                                    |                  |
|------------------------------------|------------------|
|                                    | Hypertension (2) |
| Allergy (1)                        | Health many (1)  |
| Irritation (eye, throat, skin) (2) | Health many (2)  |
| Metabolic health (1)               | Health many (1)  |

---

| <b>Column headers</b>                    | <b>Column descriptions</b>                                                                                                                                                                                                                                                                                                                                                                                                                                                                                                                                                                                                                                                                                                                    |
|------------------------------------------|-----------------------------------------------------------------------------------------------------------------------------------------------------------------------------------------------------------------------------------------------------------------------------------------------------------------------------------------------------------------------------------------------------------------------------------------------------------------------------------------------------------------------------------------------------------------------------------------------------------------------------------------------------------------------------------------------------------------------------------------------|
| <b>Specific Condition</b>                | This lists specific health conditions under each general health outcome category. "Health many" refers to multiple conditions that are included under the general health outcome                                                                                                                                                                                                                                                                                                                                                                                                                                                                                                                                                              |
| <b>Questionnaire title</b>               | Full questionnaire title.                                                                                                                                                                                                                                                                                                                                                                                                                                                                                                                                                                                                                                                                                                                     |
| <b>Questionnaire title (abbreviated)</b> | Abbreviated questionnaire title. Some studies that deployed questionnaires only reported abbreviated questionnaire titles.                                                                                                                                                                                                                                                                                                                                                                                                                                                                                                                                                                                                                    |
| <b>Questionnaire note</b>                | This note section contains information such as the detailed questionnaire/survey section for the specific condition assessment.                                                                                                                                                                                                                                                                                                                                                                                                                                                                                                                                                                                                               |
| <b>Source</b>                            | This provides the source where the questionnaire can be found. Note, users can also find questionnaires from other sources that are not listed here but should be checking to make sure questionnaires from other sources are valid and authenticated.                                                                                                                                                                                                                                                                                                                                                                                                                                                                                        |
| <b>Link</b>                              | <p>This column shares the link to the questionnaire. For instruments uploaded in REDCap, links are unavailable but the questionnaires can be found from searching on the REDCap Shared Library (<a href="https://redcap.vumc.org/consortium/library/search.php">https://redcap.vumc.org/consortium/library/search.php</a>). Note, to download REDCap instrument, users will need to log in through their research institute account.</p> <p>Also note, to get a full list of instruments that are available on REDCap Shared Library, users can follow the hyperlink on RECap page (<a href="https://projectredcap.org/resources/library/">https://projectredcap.org/resources/library/</a>) "download a list of all library instruments"</p> |
| <b>Assessment time scale</b>             | This column provides the time scale each questionnaire is designed to assess. For example, PHQ-9 for depression evaluation assesses the symptoms over the past 2 weeks.                                                                                                                                                                                                                                                                                                                                                                                                                                                                                                                                                                       |
| <b>Target age group</b>                  | This column shares age group of the target population the questionnaire is designed to assess.                                                                                                                                                                                                                                                                                                                                                                                                                                                                                                                                                                                                                                                |
| <b>Literature where used</b>             | This column shares the published studies that have deployed the questionnaire(s).                                                                                                                                                                                                                                                                                                                                                                                                                                                                                                                                                                                                                                                             |
